# Supplementary material for: A novel test device and quantitative colorimetric method for the detection of human chorionic gonadotropin (hCG) based on Au@Zn–salen MOF for POCT applications
Source: Royal Society of Chemistry journal article supplement (doi:10.1039/d2ra07854f), 2023-01-01
Supplement: d2ra07854f1.pdf [file d2ra07854f1.pdf]

## Supporting Information

*for*

### **Novel test device and colorimetric quantitative method for detection of human chorionic gonadotropin (hCG) based on Au@Zn-Salen MOF for POCT applications**

Reda M. Mohamed<sup>a</sup>, Said M. El-Sheikh<sup>b</sup>, Mohammad W. Kadi<sup>a</sup>, Ammar A. Labib<sup>c</sup>, Sheta M. Sheta<sup>c,\*</sup>

<sup>a</sup> Chemistry Department, Faculty of Science, King Abdul-Aziz University, P.O. Box 80203, Jeddah, 21589, Saudi Arabia; redama123@yahoo.com.

<sup>b</sup> Department of Nanomaterials and Nanotechnology, Central Metallurgical R & D Institute, Cairo, 11421, Egypt; selsheikh2001@gmail.com.

<sup>c</sup> Department of Inorganic Chemistry, National Research Centre, Cairo, 12622, Egypt; dr.sheta.nrc@gmail.com, ammar\_al@yahoo.com.

\* Correspondence: selsheikh2001@gmail.com; redama123@yahoo.com; dr.sheta.nrc@gmail.com; Tel.: +20 1009697356; Fax: +2-02-33370931.

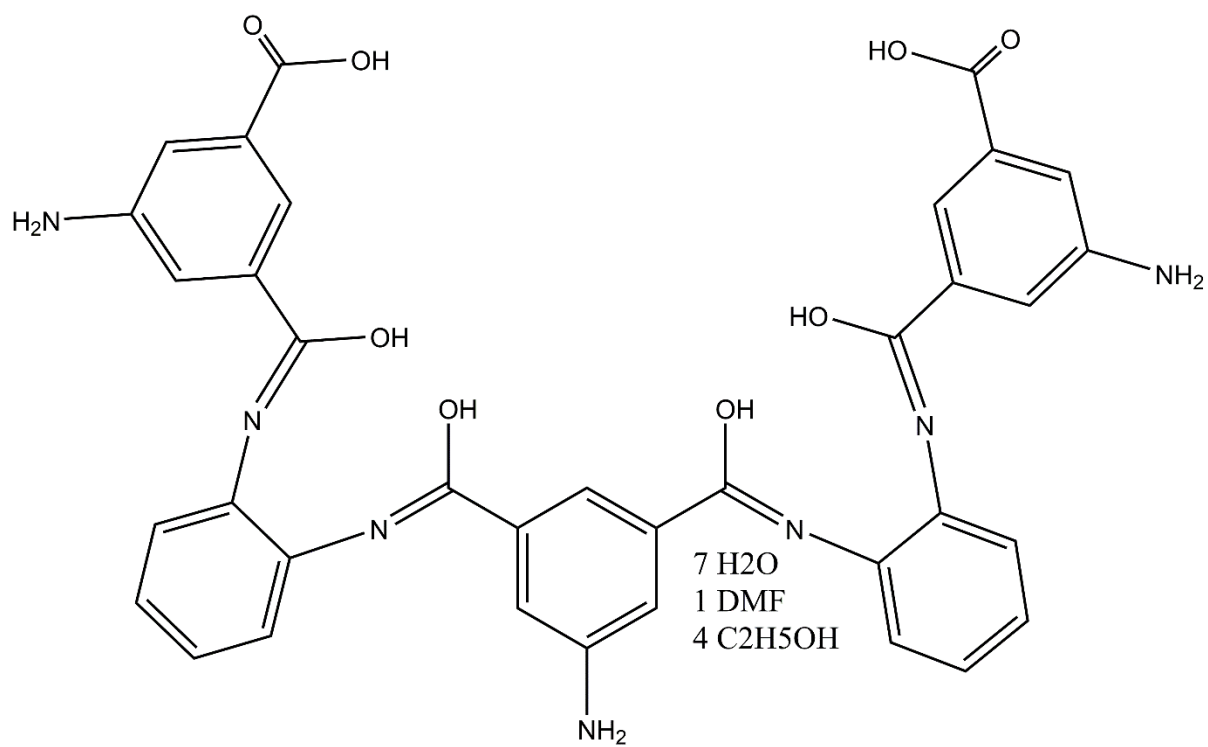

Fig. S1: Organic nano-linker chemical structure.

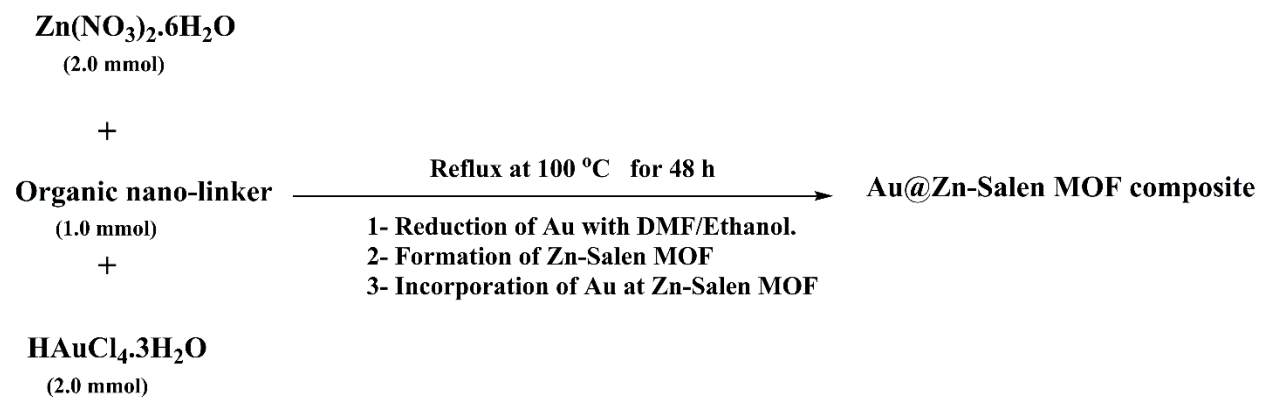

**Fig. S2:** The proposed reaction mechanism Scheme of the Au-Zn-Sln-MOF composite synthesis.

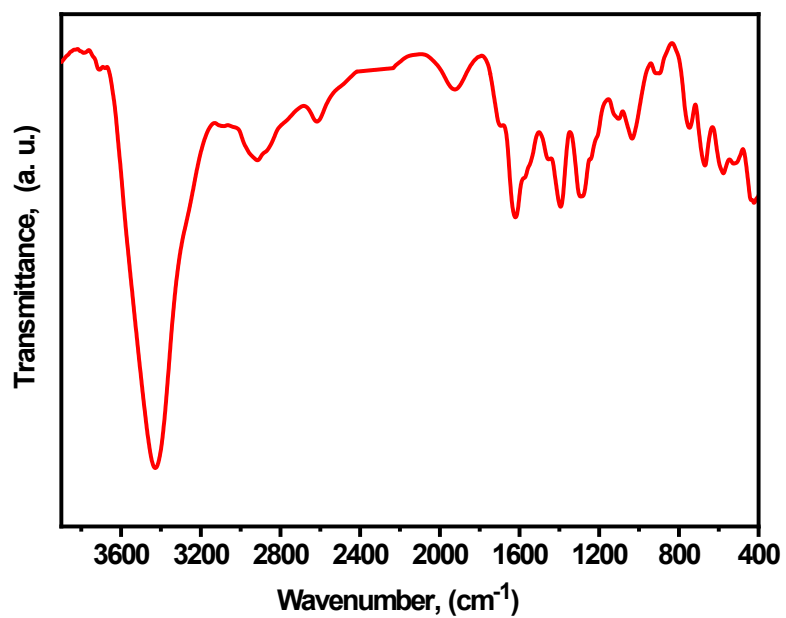

Fig. S3: The FT-IR spectrum of the organic linker.

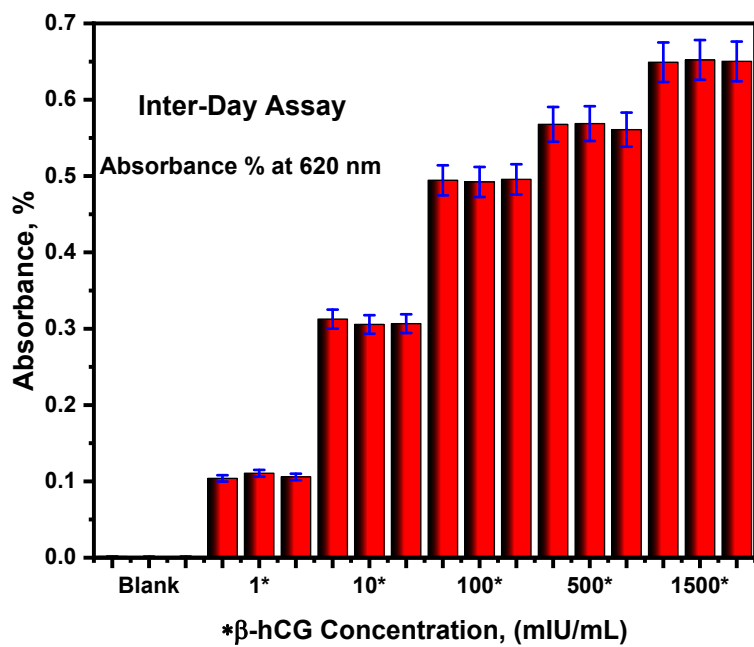

Fig. S4. A histogram of evaluation of inter-day accuracy, and precision for the colorimetric biosensor.

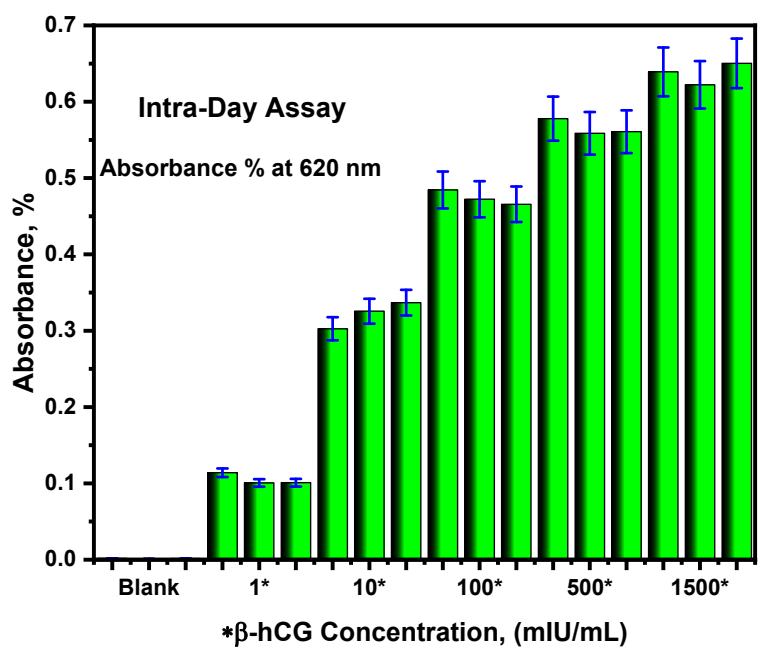

**Fig. S5.** A histogram of evaluation of intra-day accuracy, and precision for the colorimetric biosensor.

**Table S1:** EDX analysis of the Au-Zn-SIn-MOF composite.

| <b>Element</b> | <b>Weight %</b> | <b>Atomic %</b> | <b>Net Int.</b> | <b>Error %</b> |
|----------------|-----------------|-----------------|-----------------|----------------|
| C              | 27.23           | 66.73           | 9.83            | 14.84          |
| N              | 1.89            | 3.98            | 0.29            | 96.75          |
| O              | 9.39            | 17.27           | 4.42            | 21.49          |
| Zn             | 9.41            | 4.24            | 5.21            | 24.97          |
| Au             | 52.08           | 7.78            | 7.54            | 23.85          |

**Table S2:** Evaluation of swabs test device in compared with two product pregnancy hCG cassettes rapid test kits in the market in different real samples.

| Sample type | No. of samples | NOVA-test-Kit  |     |       | Medicaldisposables .US-Kit |     |       | Swaps test device |     |       |
|-------------|----------------|----------------|-----|-------|----------------------------|-----|-------|-------------------|-----|-------|
|             |                | +ve            | -ve | false | +ve                        | -ve | false | +ve               | -ve | false |
| Serum       | 25 +ve         | 19             | 0   | 6     | 22                         | 0   | 3     | 25                | 0   | 0     |
|             | 25 -ve         | 0              | 23  | 2     | 0                          | 21  | 4     | 0                 | 24  | 1     |
| Plasma      | 25 +ve         | Not applicable |     |       | Not applicable             |     |       | 24                | 0   | 1     |
|             | 25 -ve         | Not applicable |     |       | Not applicable             |     |       | 0                 | 24  | 1     |
| Urine       | 25 +ve         | 21             | 0   | 4     | 18                         | 0   | 7     | 25                | 0   | 0     |
|             | 25 -ve         | 0              | 22  | 3     | 0                          | 19  | 6     | 0                 | 23  | 2     |

\* **+ve**, Positive pregnancy samples; **-ve**, Negative pregnancy samples; **false**, false positive or negative result.



**Table S3.** Comparison between the current colorimetric immunoassay biosensor and some published methods for the determination of hCG hormone.

| <b>Method</b>                                                                               | <b>Linear detection range</b> | <b>LOD</b>       | <b>Reference</b> |
|---------------------------------------------------------------------------------------------|-------------------------------|------------------|------------------|
| A plasmonic thermal sensing based portable device (lateral flow assay)                      | ----                          | 2.8<br>mIU/mL    | [5]              |
| Electrochemiluminescence immunoassay using silver carbon quantum dots                       | 0.001 - 500<br>mIU/mL         | 0.33<br>μIU/mL   | [8]              |
| Colorimetric immunoassay using peroxidase-mimicking MnO <sub>2</sub> nanorods               | 0.5 - 400<br>mIU/mL           | 0.36<br>mIU/mL   | [9]              |
| Quantitative automated method based Modular Analytics E170 module (Roche)                   | 6.0 - 800<br>mU/L             | 0.7<br>U/L       | [12]             |
| Microfluidic Lateral Flow Assay                                                             | ---                           | 1.26<br>ng/mL    | [19]             |
| A smartphone-based lateral flow strip                                                       | 6–300<br>ng/mL                | 3.0<br>ng/mL     | [20]             |
| Voltametric immunosensor using a glassy carbon electrode modified with silver nanoparticles | 0.0212 - 530<br>mIU/mL        | 0.066<br>mIU/mL  | [27]             |
| Three-dimensional CoNi-MOF nanosheet array-based immunosensor                               | 0.005 - 250<br>mIU/mL         | 0.0185<br>mIU/mL | [26]             |
| Colorimetric immunoassay method based on Au-Zn-SIn-MOF composite                            | 0.01 – 3000<br>mIU/mL         | 0.055<br>mIU/mL  | The present work |

**Table S4:** Sensitivity and regression parameters for colorimetric immunoassay biosensor

| <b>Parameter</b>                      | <b>Method</b> |
|---------------------------------------|---------------|
| Absorbance, nm                        | 620           |
| Limit of detection (LOD), mIU/mL      | 0.055         |
| Limit of quantification (LOQ), mIU/mL | 0.167         |
| Regression equation                   | $(Y=a+bX)^*$  |
| Intercept (a)                         | 0.150         |
| Slope (b)                             | 0.159         |
| Standard deviation                    | 0.0027        |
| Correlation coefficient ( $r^2$ )     | 0.998         |

*\*Y, is the absorbance intensities; X, is the concentration of- hCG in mIU/mL; a, is intercept; b, is slope.*

**Table S5:** Evaluation of intra-day, inter-day accuracy, and precision study.

| hCG<br>mIU/mL | Intra-day assays* |       |       |       | Inter-day assays* |       |       |       |
|---------------|-------------------|-------|-------|-------|-------------------|-------|-------|-------|
|               | X                 | SD    | CV    | RE%   | X                 | SD    | CV    | RE%   |
| 1.0           | 1.036             | 0.068 | 0.005 | 0.965 | 1.005             | 0.006 | 0.009 | 0.995 |
| 10.0          | 9.972             | 0.293 | 0.086 | 1.003 | 10.55             | 0.208 | 0.043 | 0.948 |
| 100.0         | 99.67             | 0.175 | 0.031 | 1.003 | 103.3             | 0.681 | 0.463 | 0.968 |
| 500.0         | 497.6             | 1.285 | 1.653 | 1.005 | 496.7             | 2.606 | 6.79  | 1.007 |
| 1500.0        | 1501              | 2.478 | 6.142 | 0.999 | 1469              | 3.183 | 10.13 | 1.021 |

\* Each reading was repeated three times; X, mean values; SD, standard deviation; CV, the coefficient of variation; %RE, percent of relative error.

**Table S6:** Determination of hCG in different real samples using colorimetric immunoassay biosensor

| Sample         | Initial hCG concentration in sample mIU/mL | hCG Spiked mIU/mL | Found (mIU/mL) |       |       | X     | RSD   | RC%   |
|----------------|--------------------------------------------|-------------------|----------------|-------|-------|-------|-------|-------|
| Serum samples  | 3.16                                       | 0.5               | 3.639          | 3.701 | 3.696 | 3.678 | 0.034 | 100.5 |
|                |                                            | 10                | 12.92          | 13.4  | 13.27 | 13.2  | 0.245 | 100.3 |
|                |                                            | 100               | 102.9          | 102   | 101   | 102   | 0.94  | 98.84 |
|                |                                            | 1000              | 1002           | 1001  | 998.4 | 1000  | 1.839 | 99.73 |
| Plasma samples | 2.74                                       | 0.5               | 3.171          | 3.169 | 3.182 | 3.174 | 0.007 | 97.96 |
|                |                                            | 10                | 12.38          | 12.33 | 13.18 | 12.63 | 0.474 | 99.15 |
|                |                                            | 100               | 99.16          | 100.3 | 98.29 | 99.25 | 1.004 | 96.6  |
|                |                                            | 1000              | 998            | 998.5 | 994.7 | 997.1 | 2.07  | 99.44 |
| Urine samples  | 4.14                                       | 0.5               | 4.501          | 4.479 | 4.465 | 4.482 | 0.018 | 96.59 |
|                |                                            | 10                | 13.62          | 13.45 | 13.69 | 13.59 | 0.123 | 96.1  |
|                |                                            | 100               | 98.75          | 99.4  | 106.4 | 101.5 | 4.249 | 97.48 |
|                |                                            | 1000              | 979.6          | 972.5 | 966.6 | 972.9 | 6.536 | 96.89 |

\* X, mean values; RSD, relative standard deviation; RC %, Recovery percent.

## Appendix A: Materials & Instrumentation

### Materials

1, 2-phenylenediamine  $C_6H_8N_2$ ,  $Zn(NO_3)_2 \cdot 6H_2O$ , and  $HAuCl_4 \cdot 3H_2O$  were purchased from Sigma-Aldrich. 5-aminoisophthalic acid  $C_8H_7NO_4$ , was purchased from Acros-organics. All proteins and hormones standards like bovine serum albumin (BSA), human HCG antigen, anti-human HCG monoclonal antibody (Anti-HCG), Alpha-fetoprotein (AFP), carcinoembryonic antigen (CEA), follicle-stimulating hormone (FSH), luteinizing hormone (LH), prolactin (PRL), prostate-specific-antigen (PSA), and  $\alpha$ -fetoprotein (AFP), were purchased from Monobind, Inc. Company, USA. All solvents and chemicals used in this study were of analytical reagent grade and were purchased from Sigma Aldrich and used as received. High purity deionized water (resistivity: 18.2 M $\Omega$  cm, TOC: 3 ppb) obtained by using a Milli-Q Plus system (Millipore Corp., Bedford, MA, USA) was used throughout.

### Characterization

The characterization and applications were performed using different analytical techniques: The FE-SEM images and EDX spectroscopy spectra were recorded with a combination of field emission scanning electron microscopy (FE-SEM), and element mapping by spatially resolved energy-dispersive X-ray spectroscopy (EDX) (JEOL JSM-6510LV, Japan). The structures of the phases formed were examined by using a high-resolution transmission electron microscope (HR-TEM) with an acceleration voltage up to 200 kV (JEM-2100-JEOL, Japan). The Fourier-transform infrared (FT-IR) spectra were recorded with a JASCO FT/IR-460 spectrophotometer with the use of KBr tablets in the range from 400 to 4000  $cm^{-1}$  at room temperature (JASCO, USA). The UV-vis spectra were obtained using V-770 UV-Visible/NIR spectrophotometer over a range from 200 to 2200 nm (JASCO, USA), and the band gap was calculated with Optbandgap-204B software. The X-ray diffraction (XRD) analysis of Au-Zn-SIn-MOF composite was performed with a D8-AVANCE X-ray diffractometer (Bruker, Germany) with Cu-K $\alpha$  radiation ( $\lambda = 0.154056$  nm) for identification of the crystalline phase, relative crystallinity, and crystal size of as-prepared Au-Zn-SIn-MOF composite. The XRD analysis was performed in the  $2\theta$  range from 3.0° to 80.0° with a 0.020° step at a scan speed of 0.4 s.  $^1H$ -NMR spectrum is done in DMSO- $d_6$  using Gemini-300 MHz NMR spectrometer (ECA 500 II, JEOL,

Japan). Differential Scanning Calorimetry/Thermogravimetric Analysis (TGA/dTG) of the sample was carried out with a Universal V4.5-TA Instruments (USA), under atmospheric nitrogen gas with a rate of  $10\text{ }^{\circ}\text{C min}^{-1}$ . The output data obtained from different analytical techniques for characterization step like the spectra of FT-IR, UV, NMR, and TGA/dTG as well the XRD pattern, in addition to the histograms and Figures for statistical evaluation and validations of the proposed biosensor were analyzed with Origin-8.
